# Supplementary material
Source: Springer Nature journal article supplement (https://www.springermedizin.de/resource/supplementary/13550_2012_54_MOESM1_ESM.pdf/9687512)

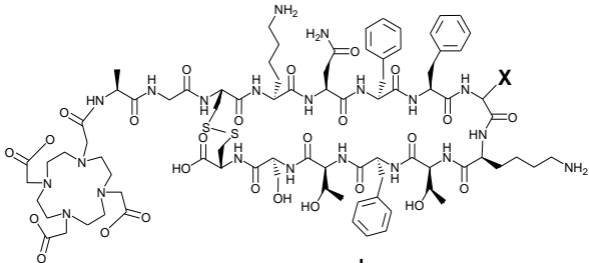

$^{111}\text{InCl}_3$

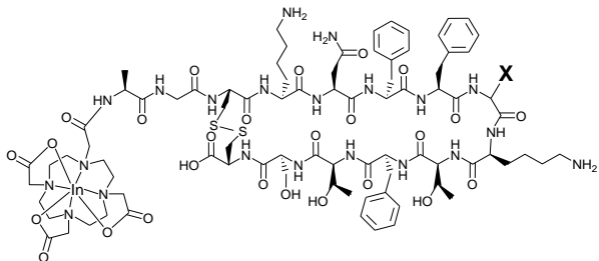

AT1S, X:

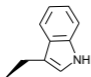

AT2S, X:

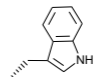

Supplement: MOESM1 [file 9687512]
